# Supplementary material for: Preparation of M–MnCo2O4 (M = Fe, Al, Bi, Cr) nanoenzymes with different doping ratios and detection of glutathione in serum
Source: Royal Society of Chemistry journal article supplement (doi:10.1039/d4nj04404e), 2025-01-01
Supplement: d4nj04404e1.pdf [file d4nj04404e1.pdf]

## **Supporting Information**

### **Preparation of M-MnCo<sub>2</sub>O<sub>4</sub>(M=Fe, Al, Bi, Cr) nanoenzymes with different doping ratios and detection of glutathione in serum**

Meiqi Li<sup>a</sup>, Qi Lian<sup>a</sup>, Xuefang Zheng<sup>a,\*</sup>, Hongmei Yu<sup>a</sup>, Mengze Zhao<sup>a</sup>, Xiaojing Guo<sup>a</sup>

(a.College of Chemical Engineering, Hebei Normal University of Science and Technology, Qinhuangdao 066601, P. R. China)

\*Corresponding author. E-mail: xuefang-zheng@163.com

## Regents

Cobalt nitrate hexahydrate ( $\text{Co}(\text{NO}_3)_3 \cdot 6\text{H}_2\text{O}$ ) purchased from Xi long Scientific Co.

3,3',5,5'-Tetramethylbenzidine (TMB) was purchased from Shanghai Jingchun Biochemical Technology Co.

Disodium hydrogen phosphate ( $\text{NaH}_2\text{PO}_4 \cdot 2\text{H}_2\text{O}$ ) and citric acid ( $\text{C}_6\text{H}_8\text{O}_7$ ) were purchased from Tianjin Chemical Reagent No.1 Factory.

Chromium nitrate hydrate ( $\text{Cr}(\text{NO}_3)_3 \cdot 9\text{H}_2\text{O}$ ), manganese sulfate monohydrate ( $\text{MnSO}_4 \cdot \text{H}_2\text{O}$ ), benzoquinone (BQ), glacial acetic acid (HAc), sodium acetate (NaAc), ferric nitrate hydrate ( $\text{Fe}(\text{NO}_3)_3 \cdot 9\text{H}_2\text{O}$ ), isopropyl alcohol (IPA), bismuth nitrate pentahydrate ( $\text{Bi}(\text{NO}_3)_3 \cdot 5\text{H}_2\text{O}$ ), and aluminum nitrate hydrate ( $\text{Al}(\text{NO}_3)_3 \cdot 9\text{H}_2\text{O}$ ) were purchased from Tianjin Kai tong Chemical Reagent Co.

Glutathione (GSH) and oxalic acid ( $\text{H}_2\text{C}_2\text{O}_4 \cdot 2\text{H}_2\text{O}$ ) were purchased from Tianjin Obo kai Chemical Co. Glucose, L-serine (Ser), histidine (His), glycine (Gly), alanine (Ala), L-threonine (Tyr), L-aspartic acid (Asp), and L-cysteine (Cys) were purchased from Aladdin reagent Co., Ltd. (China). All chemicals were of analytical grade at least.

## Apparatus

For crystallographic analysis, X-ray diffractometer was utilized. X-ray diffractometer (XRD) patterns were recorded with Rigaku (SmartLab SE, Japan) at a scan rate of  $8^\circ$  per min with a scanning range of  $10^\circ$ - $80^\circ$  using Cu-K $\alpha$  radiation ( $\lambda = 0.154$  nm, 40 kV, 40 mA).

The physical form and architecture of the  $\text{M-MnCo}_2\text{O}_4$  (M=Fe, Al, Bi, Cr) were examined using a Hitachi SU-8010 scanning electron microscope (SEM) and a JEOL

JEM-2100F transmission electron microscope (TEM).

Fourier transform infrared (FT-IR) spectra were recorded on a FT-IR-Tensor 27 spectrometer (Bruker, Germany).

Raman spectrometer(Thermo fisher, DXR 532nm) was carried to characterize the as-synthesized  $M\text{-MnCo}_2\text{O}_4$  ( $M=\text{Fe, Al, Bi, Cr}$ ) nanomaterials. A Spectra Physics solid-state laser operating at 532 nm was used for the excitation. The spectra were measured at  $2\text{ cm}^{-1}$  spectral resolution and calibrated with a neon emission lamp.

Pore size characteristics and Specific surface area were quantified with a Micromeritics ASAP2460 surface area and a pore size analyzer. In addition,  $\text{N}_2$  adsorption-desorption isotherms could be obtained by using this instrument(The sample was degassed at  $300^\circ\text{C}$  for 3h).

Surface chemical composition was analyzed via X-ray photoelectron spectroscopy (XPS) on a Thermo Fisher Scientific K-alpha spectrometer(The XPS spectrum was calibrated with foreign contaminated carbon C1s as the reference peak. The X-ray type was Mg-K $\alpha$ . The data were processed and analyzed by the software Advantage).

Magnetic resonance properties were assessed using a MS-5000 Electron Paramagnetic Resonance (EPR) spectrometer from Bruker.

Zeta potential measurement: Electrochemical workstation. All the electrochemical experiments were performed on an electrochemical workstation (Autolab PGSTAT302N, Metrohm Co.) with a traditional three-electrode system with the GCE (3.0 mm in diameter) as the working electrode, Pt foil as the counter electrode, and a saturated calomel electrode (SCE) as the reference electrode.

Ultraviolet-visible light (UV-vis, UV-1800 PC) absorption spectra and absorbance measurements were recorded on a UV-1800 PC spectrophotometer (Perkin Elmer Instrument, USA).

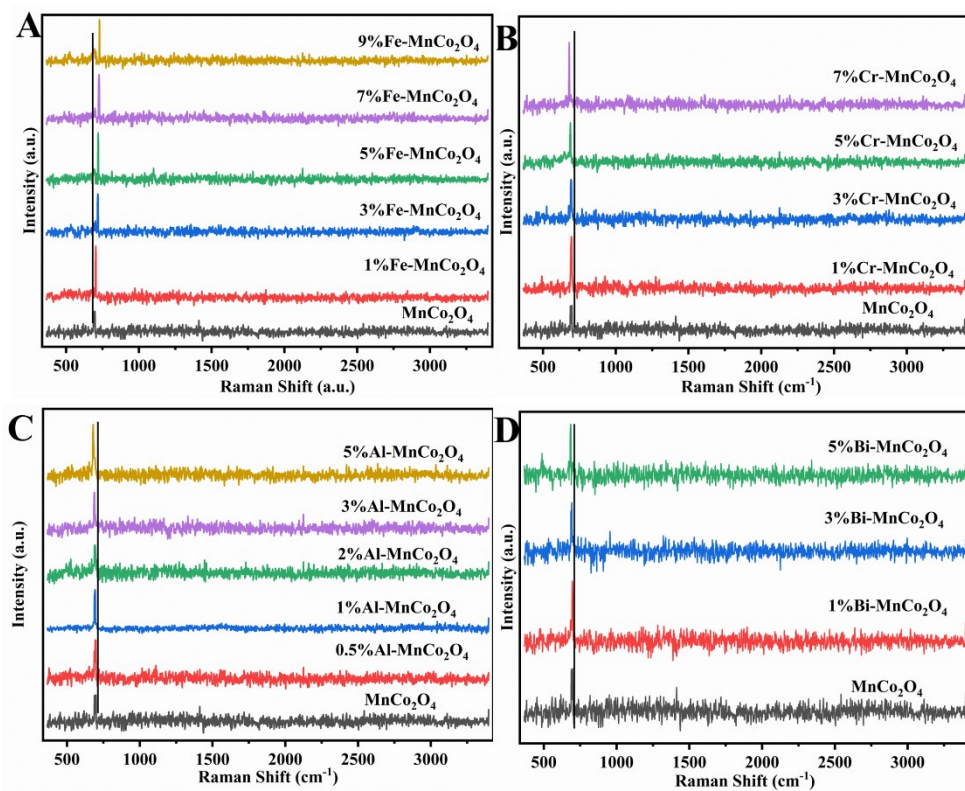

**Figure S1.** (A) Raman spectrum of Fe-MnCo<sub>2</sub>O<sub>4</sub> with doping ratio of 0, 1%, 3%, 5%, 7%, 9%, (B) Raman spectrum of Cr-MnCo<sub>2</sub>O<sub>4</sub> with doping ratio of 0, 1%, 3%, 5%, 7%, (C) Raman spectrum of Al-MnCo<sub>2</sub>O<sub>4</sub> with doping ratio of 0, 0.5%, 1%, 2%, 3%, 5%, (D) Raman spectrum of Bi-MnCo<sub>2</sub>O<sub>4</sub> with doping ratio of 0, 1%, 3%, 5%.

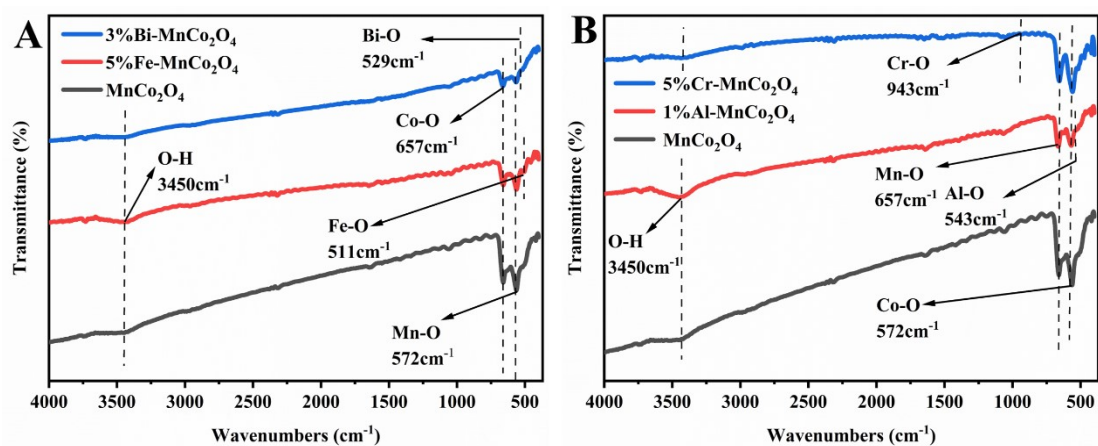

**Figure S2.** (A) FT-IR spectrum of 3%Bi-MnCo<sub>2</sub>O<sub>4</sub>, 5%Fe-MnCo<sub>2</sub>O<sub>4</sub>, MnCo<sub>2</sub>O<sub>4</sub>, (B) FT-IR spectrum of 5%Cr-MnCo<sub>2</sub>O<sub>4</sub>, 1%Al-MnCo<sub>2</sub>O<sub>4</sub>, MnCo<sub>2</sub>O<sub>4</sub>.

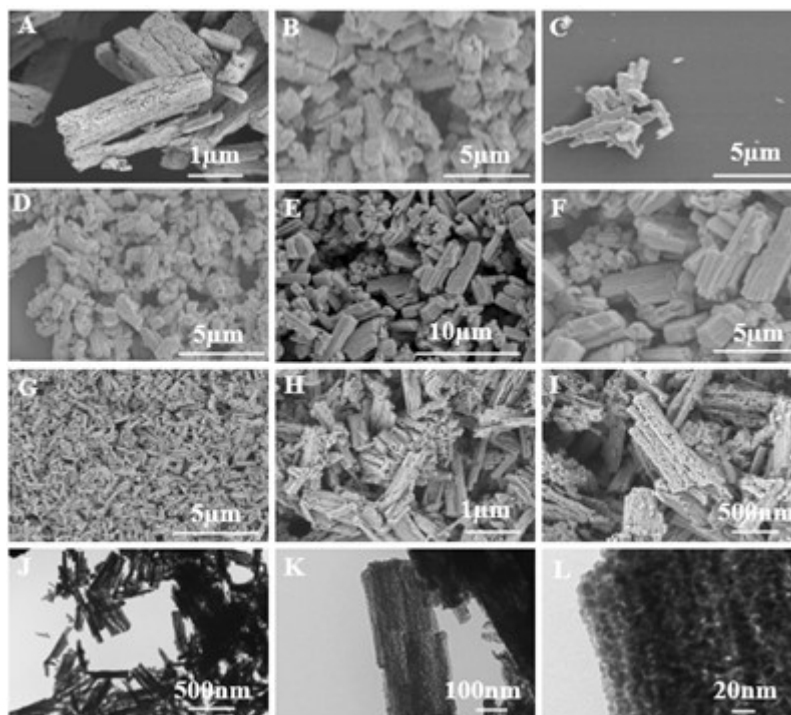

**Figure S3.** (A-D) SEM images of Cr-MnCo<sub>2</sub>O<sub>4</sub> doped different Cr element with 0%, 1%, 3%, and 5%, respectively; (E-F) SEM images of 7% Cr-MnCo<sub>2</sub>O<sub>4</sub> at different magnifications; (G-I) SEM images of 5% Cr-MnCo<sub>2</sub>O<sub>4</sub> at different magnifications; (J-L) SEM images of TEM images of 5% Cr-MnCo<sub>2</sub>O<sub>4</sub> at different magnifications;

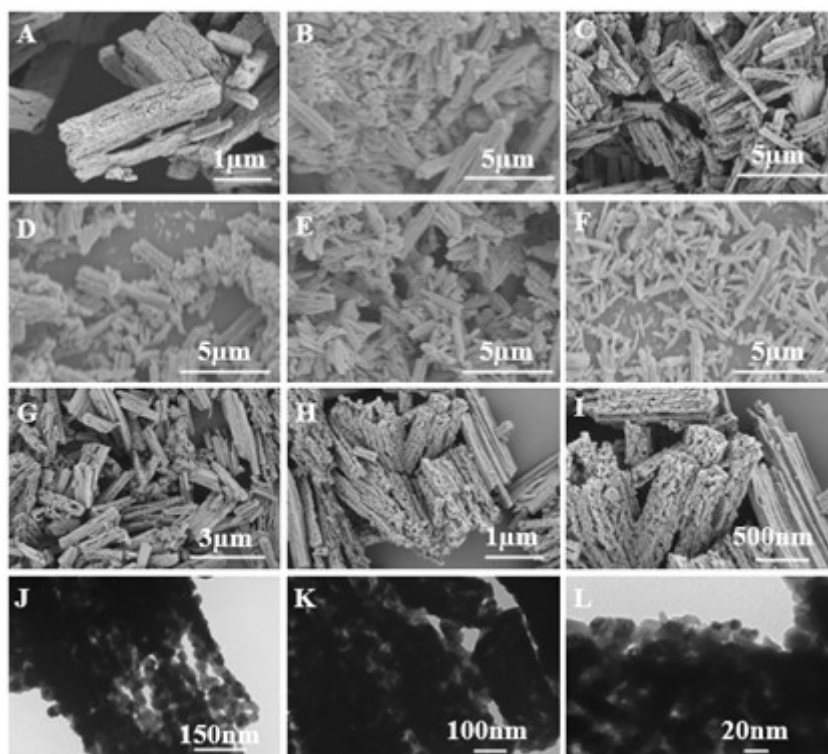

**Figure S4.** (A-F) SEM images of Al-MnCo<sub>2</sub>O<sub>4</sub>, doped Al element with different content of 0, 0.5%, 1%, 2%, 3%, and 5% respectively, (G-I) SEM images of 1% Al-MnCo<sub>2</sub>O<sub>4</sub> at different magnifications, (J-L) TEM images of 1% Al-MnCo<sub>2</sub>O<sub>4</sub> at different magnifications, respectively.



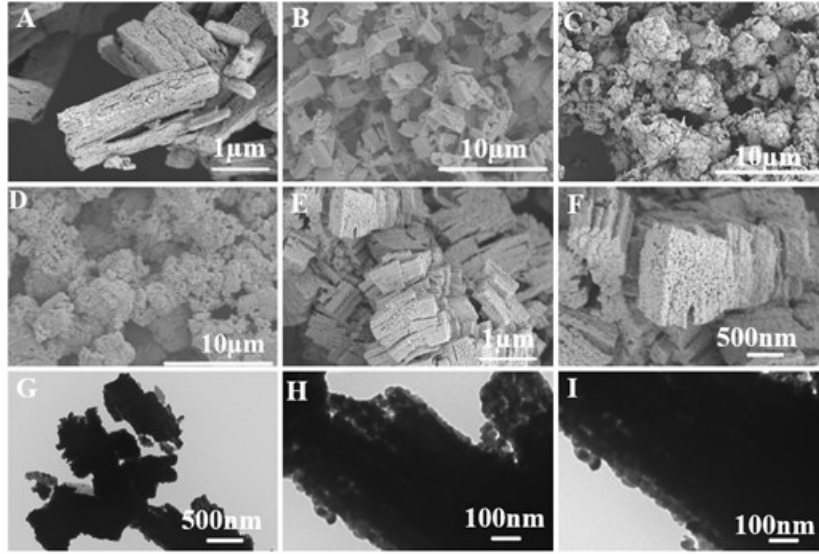

**Figure S5.** (A-D) SEM images of Bi-MnCo<sub>2</sub>O<sub>4</sub> doped Bi element with different content of 0, 1%, 3%, and 5%, (E-F) SEM images of 3% Bi-MnCo<sub>2</sub>O<sub>4</sub> at different magnifications, (G-I) TEM images of 3% Bi-MnCo<sub>2</sub>O<sub>4</sub> at different magnifications, respectively.

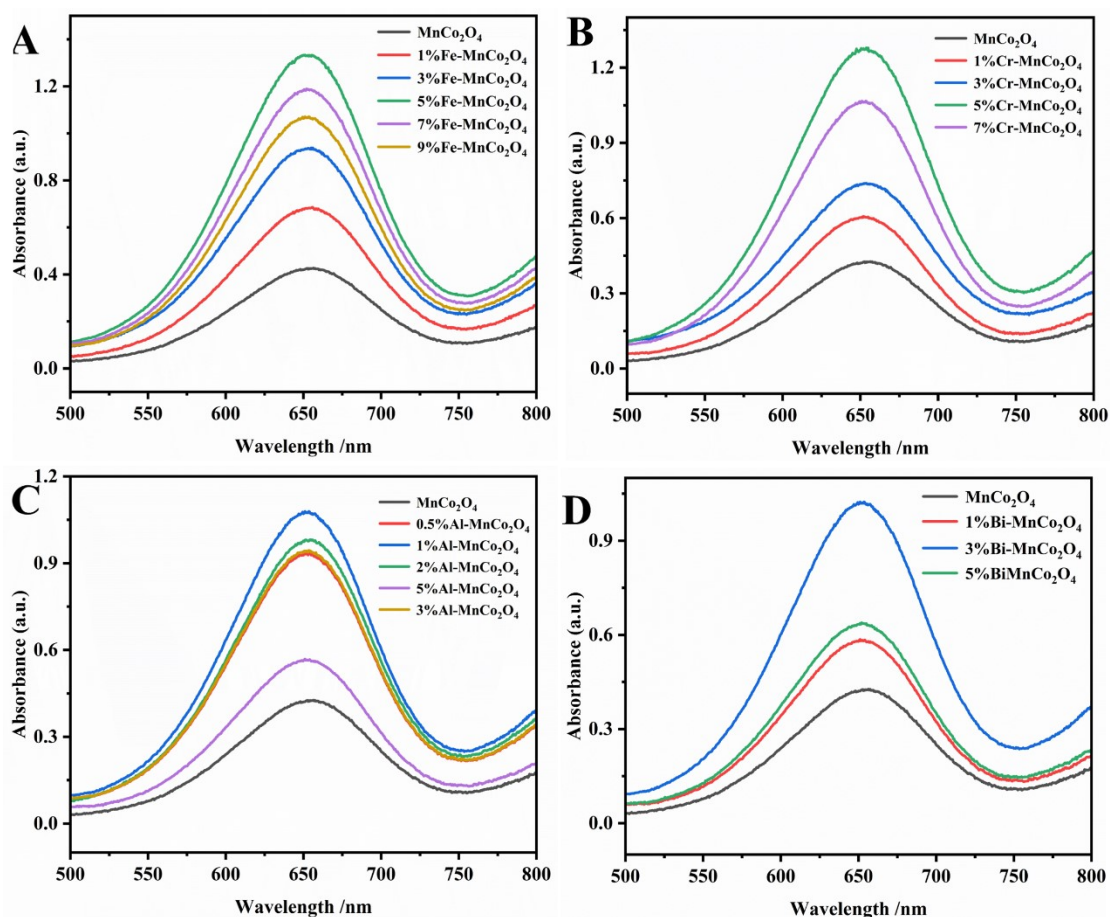

**Figure S6.** (A)UV-vis spectra of  $\text{Fe-MnCo}_2\text{O}_4$  with doping of 0,1%,3%,5%,7%,9%, (B)UV-vis spectra of  $\text{Cr-MnCo}_2\text{O}_4$  with doping of 0,1%,3%,5%,7%, (C)UV-vis spectra of  $\text{Al-MnCo}_2\text{O}_4$  with doping of 0,0.5%,1%,2%,3%,5%, (D)UV-vis spectra of  $\text{Bi-MnCo}_2\text{O}_4$  with doping of 0,1%,3%,5%.

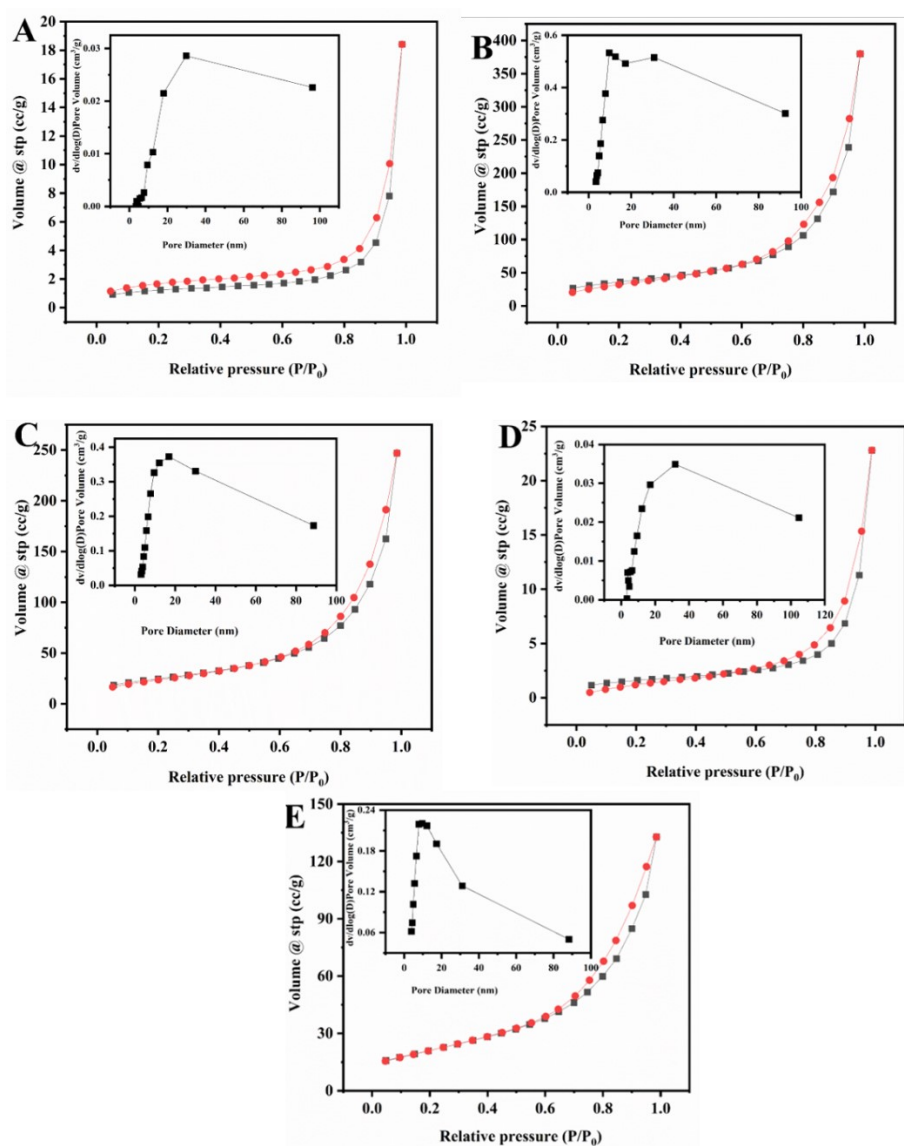

**Figure S7.** (A-E) N<sub>2</sub> adsorption-desorption of the MnCo<sub>2</sub>O<sub>4</sub>, M-MnCo<sub>2</sub>O<sub>4</sub> (M=Fe, Al, Bi, Cr) (Inset: corresponding pore size distribution)

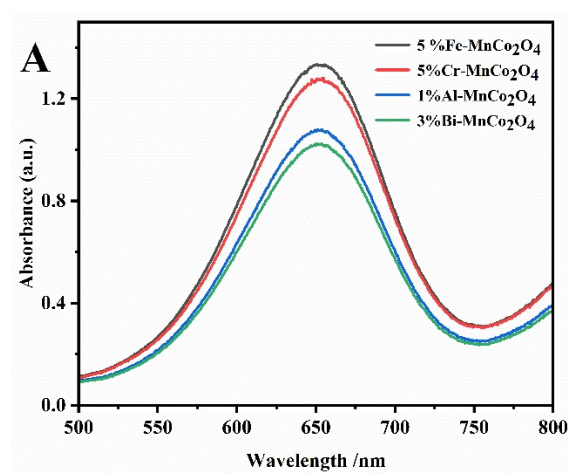

**Figure S8.** (A) UV-vis spectra of M-MnCo<sub>2</sub>O<sub>4</sub> (M=Fe, Cr, Al, Bi)

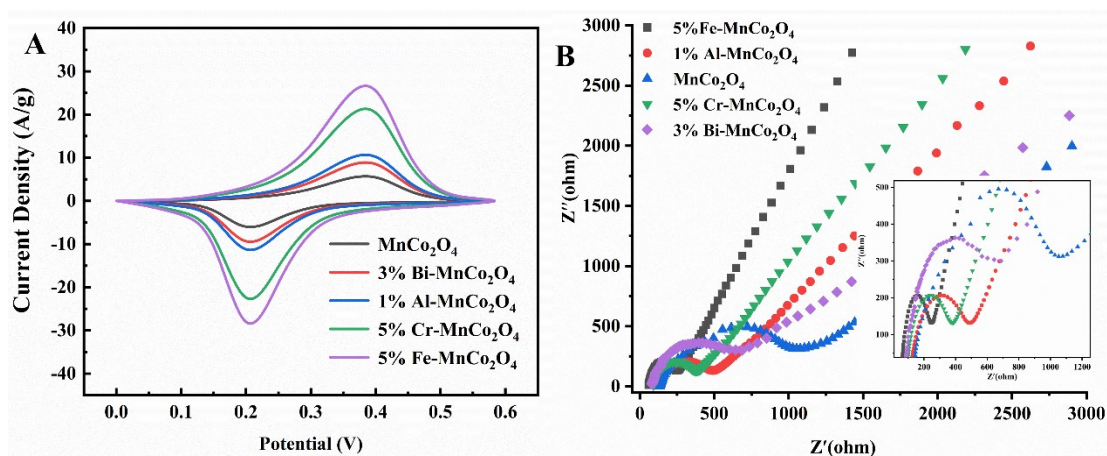

**Figure S9.** (A) Cyclic Voltammograms at scan rate  $50\text{mV s}^{-1}$ , and (B) Nyquist impedance spectrum of 5%Fe- $\text{MnCo}_2\text{O}_4$ , 1%Al- $\text{MnCo}_2\text{O}_4$ ,  $\text{MnCo}_2\text{O}_4$ , 5%Cr- $\text{MnCo}_2\text{O}_4$  and 3%Bi- $\text{MnCo}_2\text{O}_4$  materials.

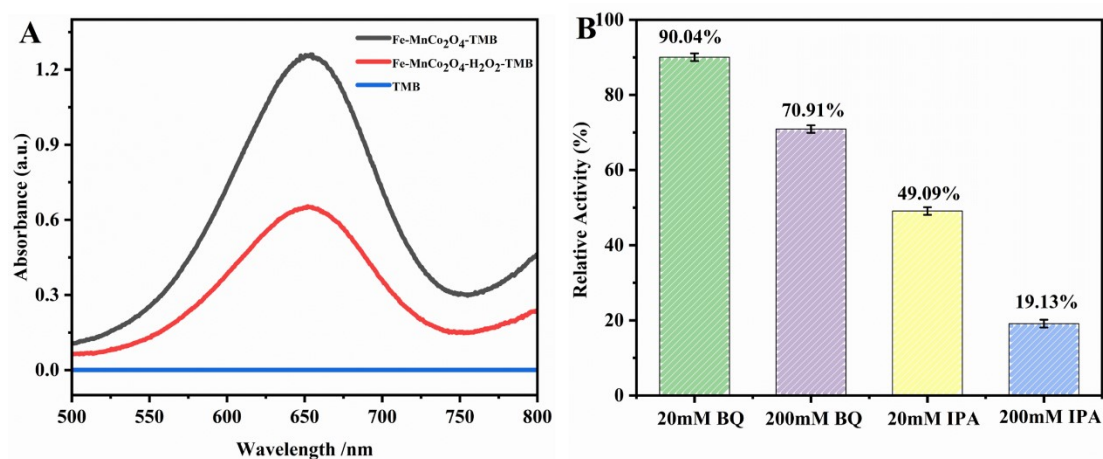

**Figure S10.** (A) the UV absorption curves of different systems (Fe-MnCo<sub>2</sub>O<sub>4</sub>-TMB, Fe-MnCo<sub>2</sub>O<sub>4</sub>-H<sub>2</sub>O<sub>2</sub>-TMB, TMB), Reaction conditions: t=10 min, pH=4, T=25°C, 15μg/ml 5% Fe-MnCo<sub>2</sub>O<sub>4</sub>, 120μM TMB, NaAc-HAc buffer (pH=4.0). (B) Effect of BQ (benzoquinone) and IPA (isopropyl alcohol) on the Fe-MnCo<sub>2</sub>O<sub>4</sub>-H<sub>2</sub>O<sub>2</sub>-TMB system.

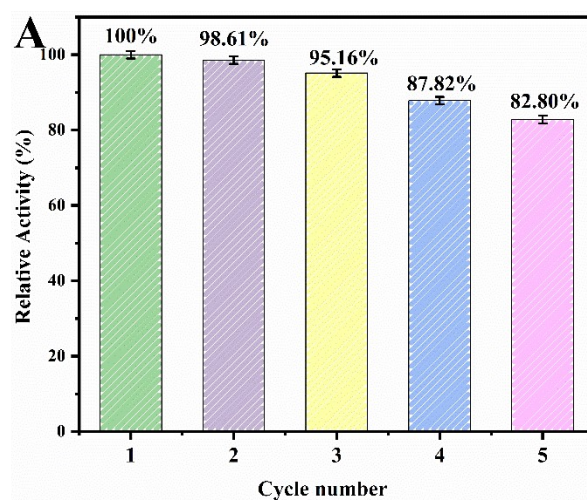

**Figure S11.** (A) Relative activity (%) of Fe-MnCo<sub>2</sub>O<sub>4</sub> over 5 cycles under optimal reaction conditions.

**Table S1.** Comparison between Previously Reported Composites and Fe-MnCo<sub>2</sub>O<sub>4</sub> Colorimetric Sensor for Detection of the Concentration of GSH

| Materials                                        |     | Method                    | LOD      | Linear range | References |
|--------------------------------------------------|-----|---------------------------|----------|--------------|------------|
| Fe-MnCo <sub>2</sub> O <sub>4</sub>              |     | Colorimetric detection    | 0.1430μM | 0-30μM       | This work  |
| Au                                               |     | Colorimetric detection    | 0.5μM    | 0.5-1.25μM   | 33         |
| Hg <sup>2+</sup> -double-stranded probe          | DNA | Colorimetric detection    | 7.4nM    | 0.05-2.5μM   | 18         |
| Sb-FeOCl                                         |     | Colorimetric detection    | 0.495μM  | 1-36μM       | 34         |
| MnO <sub>2</sub>                                 |     | Colorimetric detection    | 0.94μM   | 1-80μM       | 35         |
| AuNP-PEDOT/GCE                                   |     | Electrochemical detection | 0.173μM  | 0.5-10μM     | 36         |
| B-CDs                                            |     | Colorimetric detection    | 0.62μM   | 0-20μM       | 37         |
| Fe <sub>3</sub> O <sub>4</sub> -MnO <sub>2</sub> |     | Colorimetric detection    | 0.2μM    | 0.2-25μM     | 38         |
